# Supplementary material for: Ratiometric detection of Hg2+ ions: an allosterically synchronized Hg2+/Li+ switch based on thiacalix[4]crown
Source: Royal Society of Chemistry journal article supplement (doi:10.1039/c1dt10093a), 2011-01-01
Supplement: c1dt10093a.pdf [file c1dt10093a.pdf]

## Supporting Information

### **Ratiometric Detection of Hg<sup>2+</sup> ions: An Allosterically Synchronized Hg<sup>2+</sup>/Li<sup>+</sup> Switch Based on Thiacalix[4]crown**

*Manoj Kumar,\* Naresh Kumar and Vandana Bhalla*

Department of Chemistry,

UGC Centre for Advanced Studies,

Guru Nanak Dev University, Amritsar, Punjab -143005, INDIA

- 2 Fluorescence spectra of **4** in the presence of different metal ions.
- 3 UV-vis spectra of **4** in the presence of different metal ions.
- 4 <sup>1</sup>H NMR Spectrum of **2**.
- 5 <sup>13</sup>C NMR Spectrum of **2**.
- 6 Mass Spectrum of **2**.
- 7 <sup>1</sup>H NMR Spectrum of **3**.
- 8 <sup>13</sup>C NMR Spectrum of **3**.
- 9 Mass Spectrum of **3**.
- 10 <sup>1</sup>H NMR Spectrum of **4**.
- 11 <sup>13</sup>C NMR Spectrum of **4**.
- 12 Mass Spectrum of **4**.
- 13 IR Spectrum of **4**.
- 14 <sup>1</sup>H NMR spectra of **4** in CDCl<sub>3</sub>/CD<sub>3</sub>CN (8:2). (A) Free ligand (B) in presence of 1.0 equiv of mercury perchlorate; (C) in presence of 1.0 equiv of lithium perchlorate.

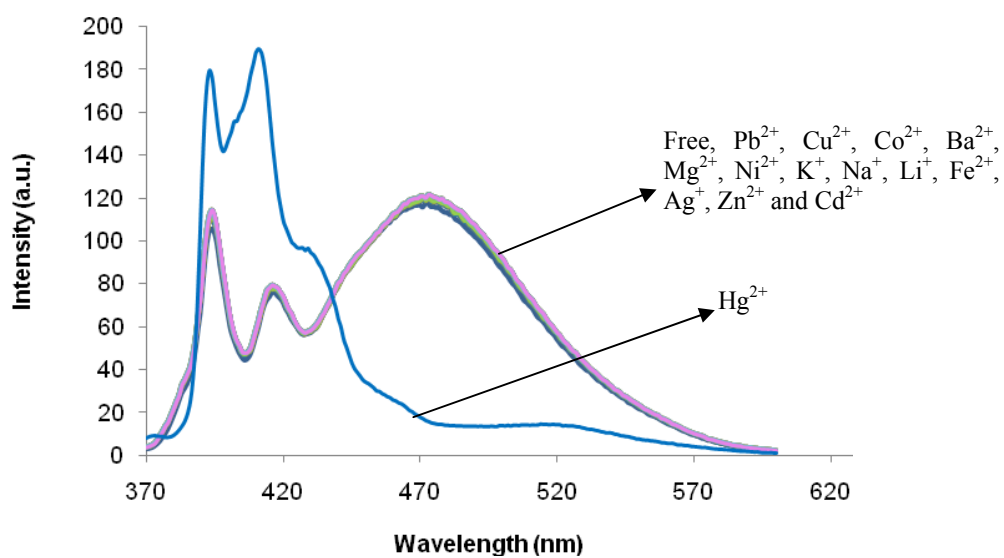

**Figure S1.** Fluorescence spectra of **1** (1  $\mu\text{M}$ ) in response to the presence of different metal ions (10 equiv. each) in THF,  $\lambda_{\text{ex}} = 343$  nm.

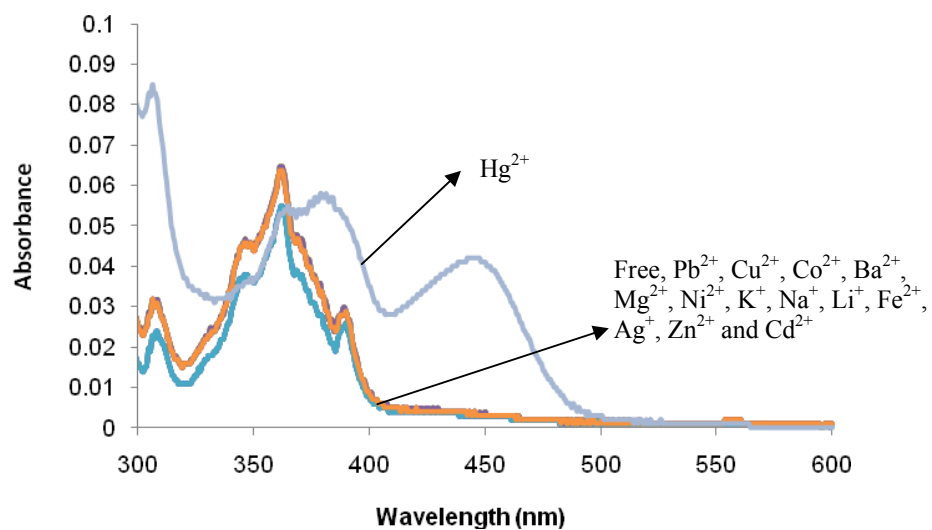

**Figure S2.** UV-vis spectra of **4** (1  $\mu\text{M}$ ) in response to the presence of different metal ions (30 equiv each) in THF.

$^1\text{H}$  NMR spectrum of compound **2**

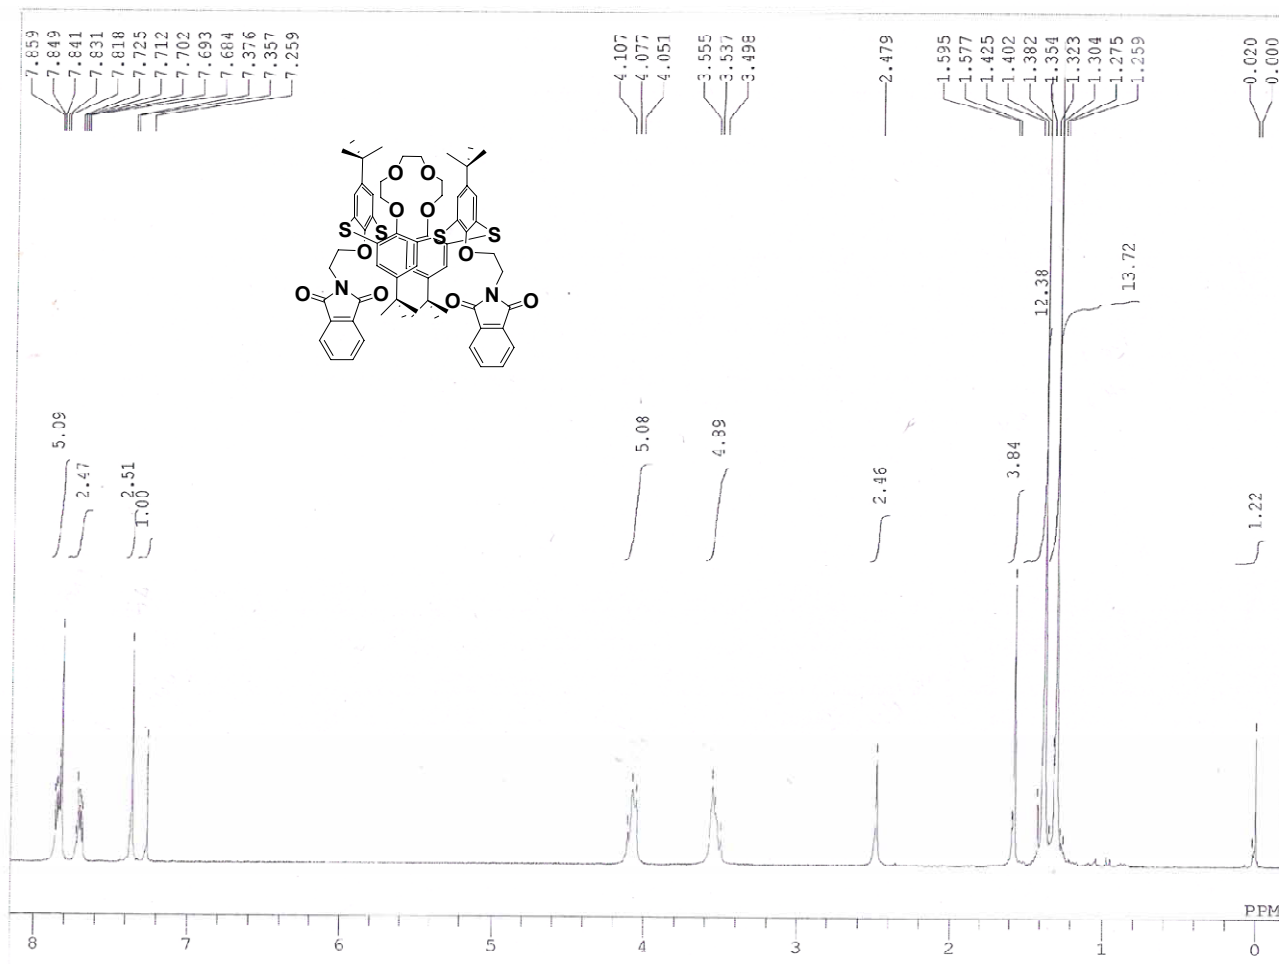

$^{13}\text{C}$  NMR spectrum of compound **2**

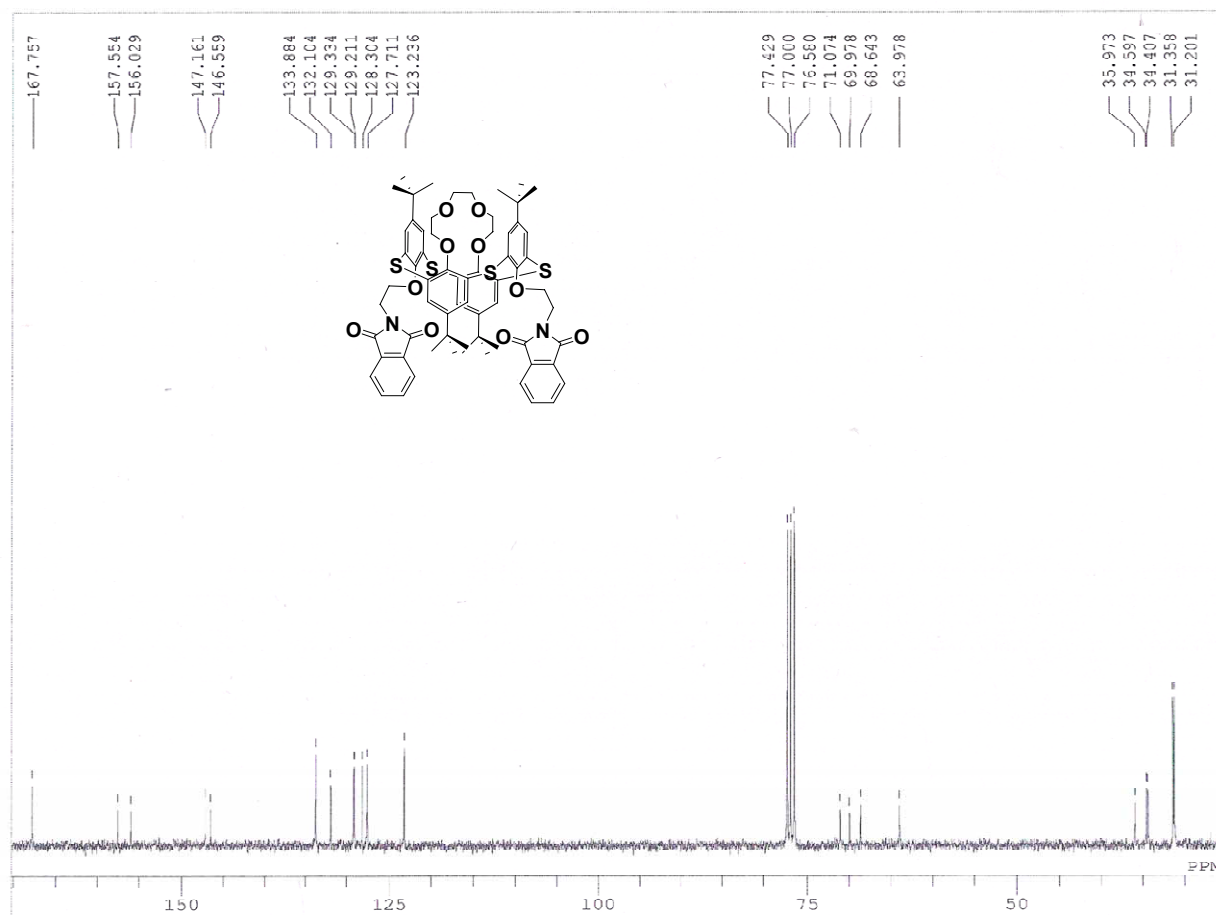

## Mass spectrum of compound 2

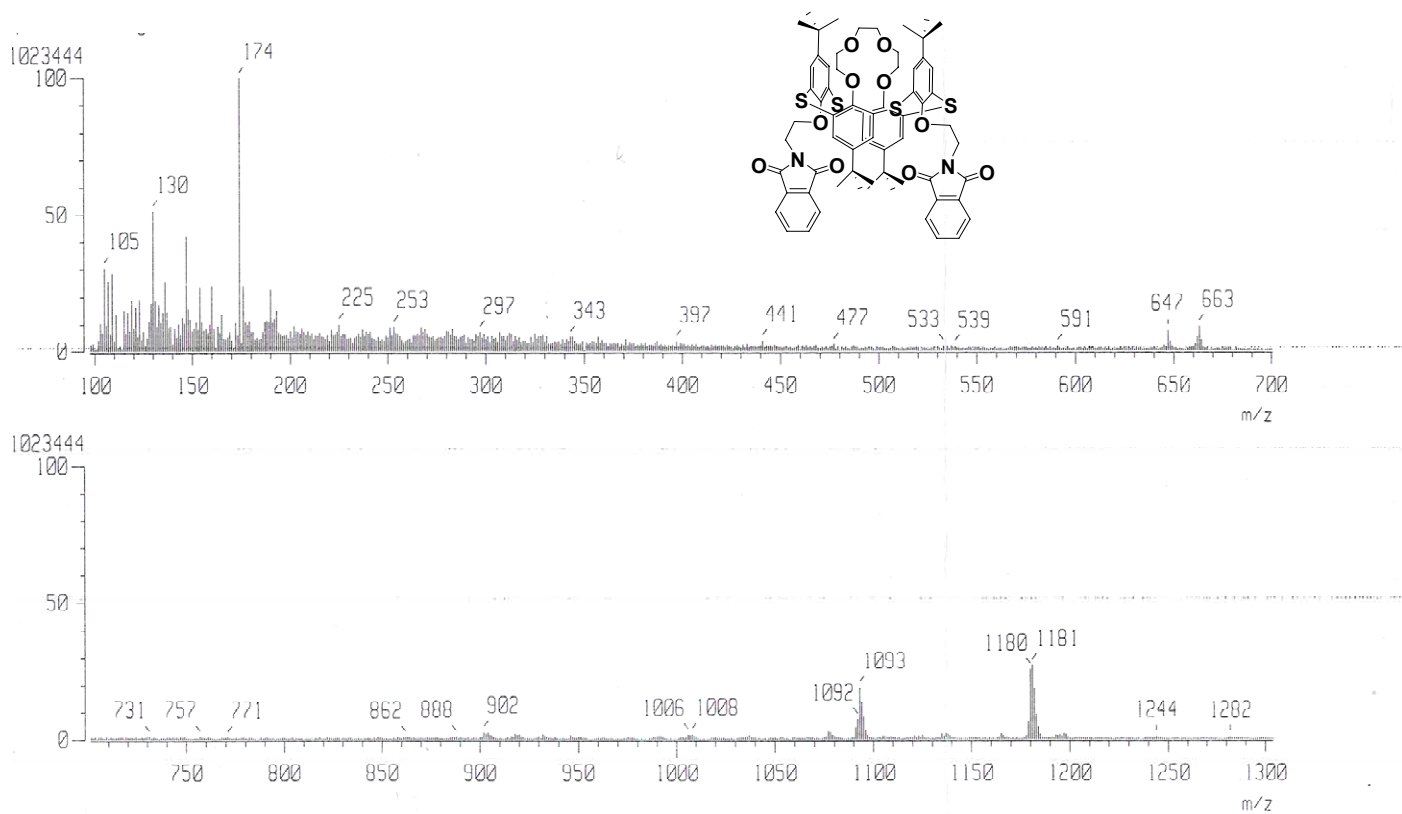

$^1\text{H}$  NMR spectrum of compound **3**

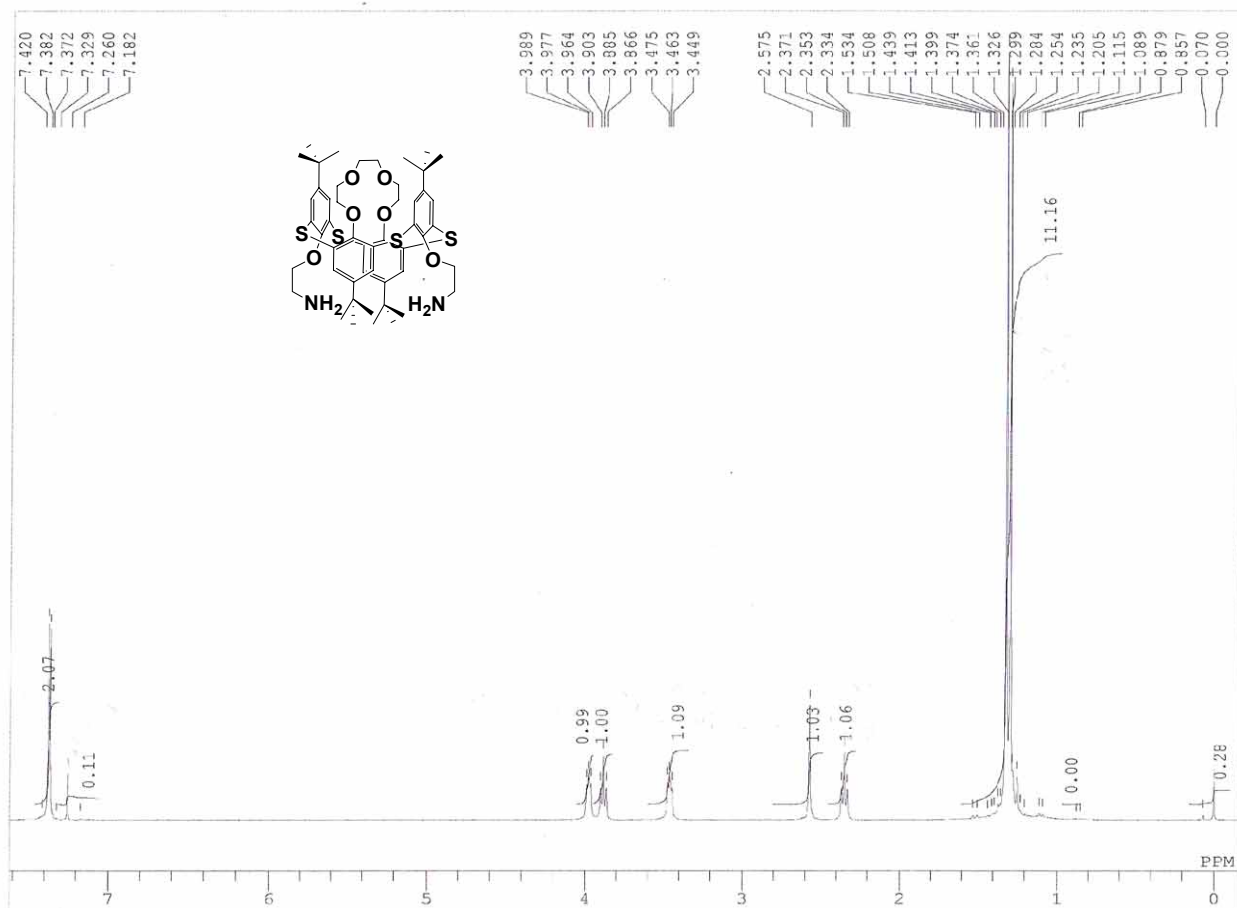

$^{13}\text{C}$  NMR spectrum of compound **3**

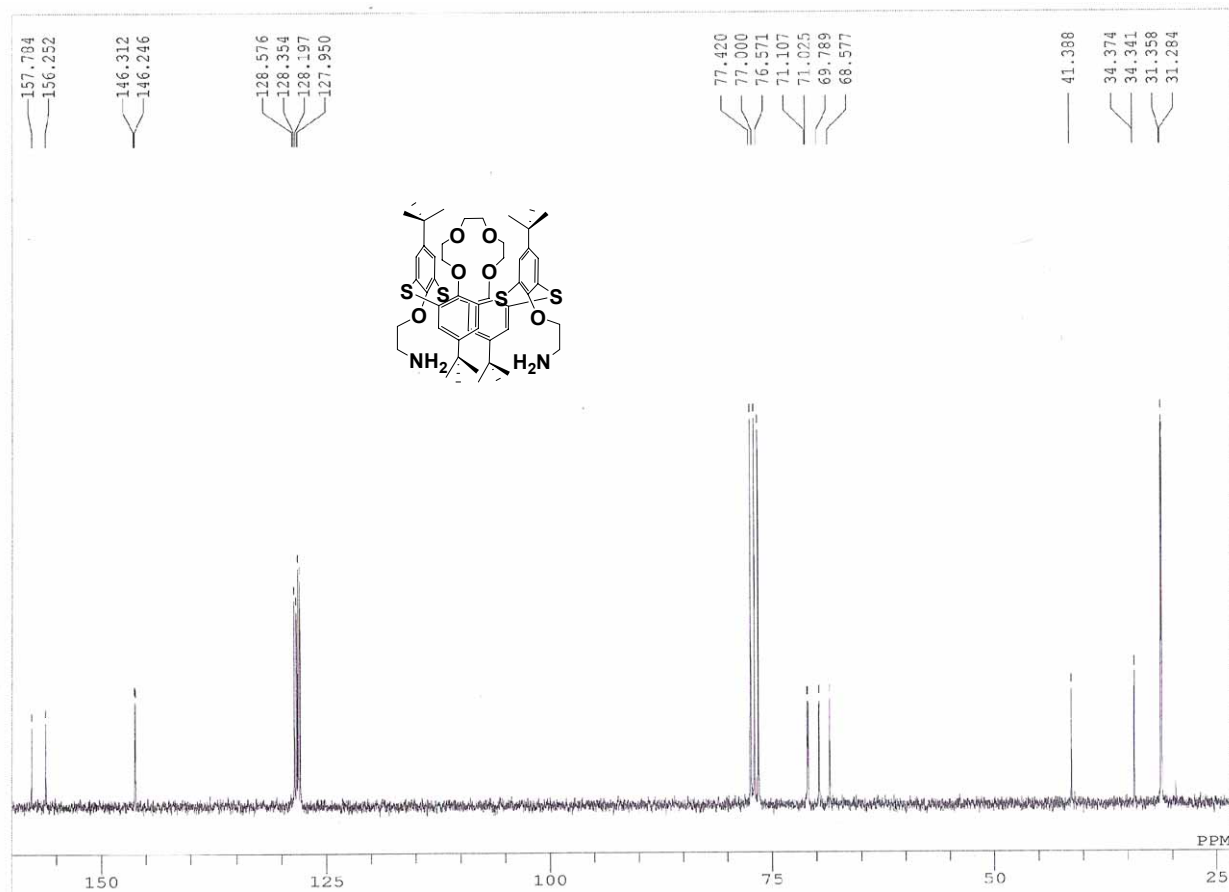



### Mass spectrum of compound 3

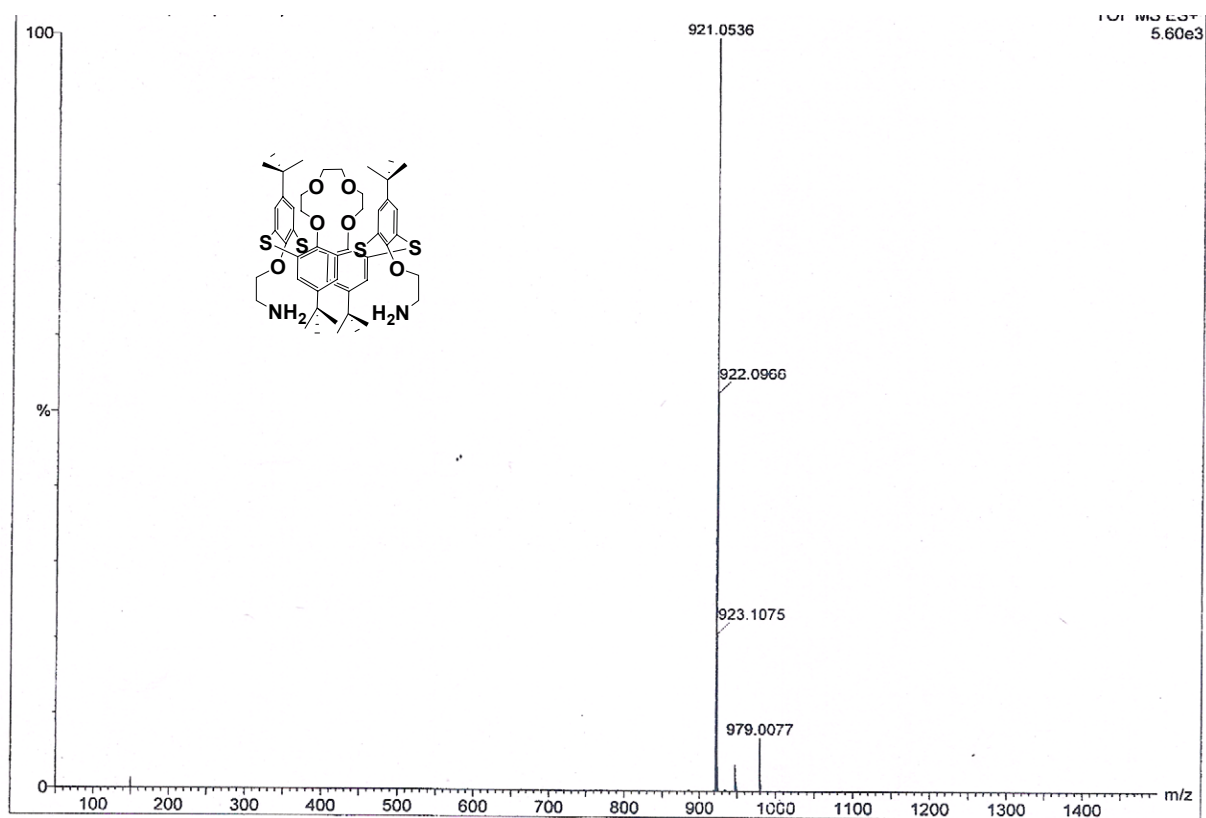

$^1\text{H}$  NMR spectrum of compound 4

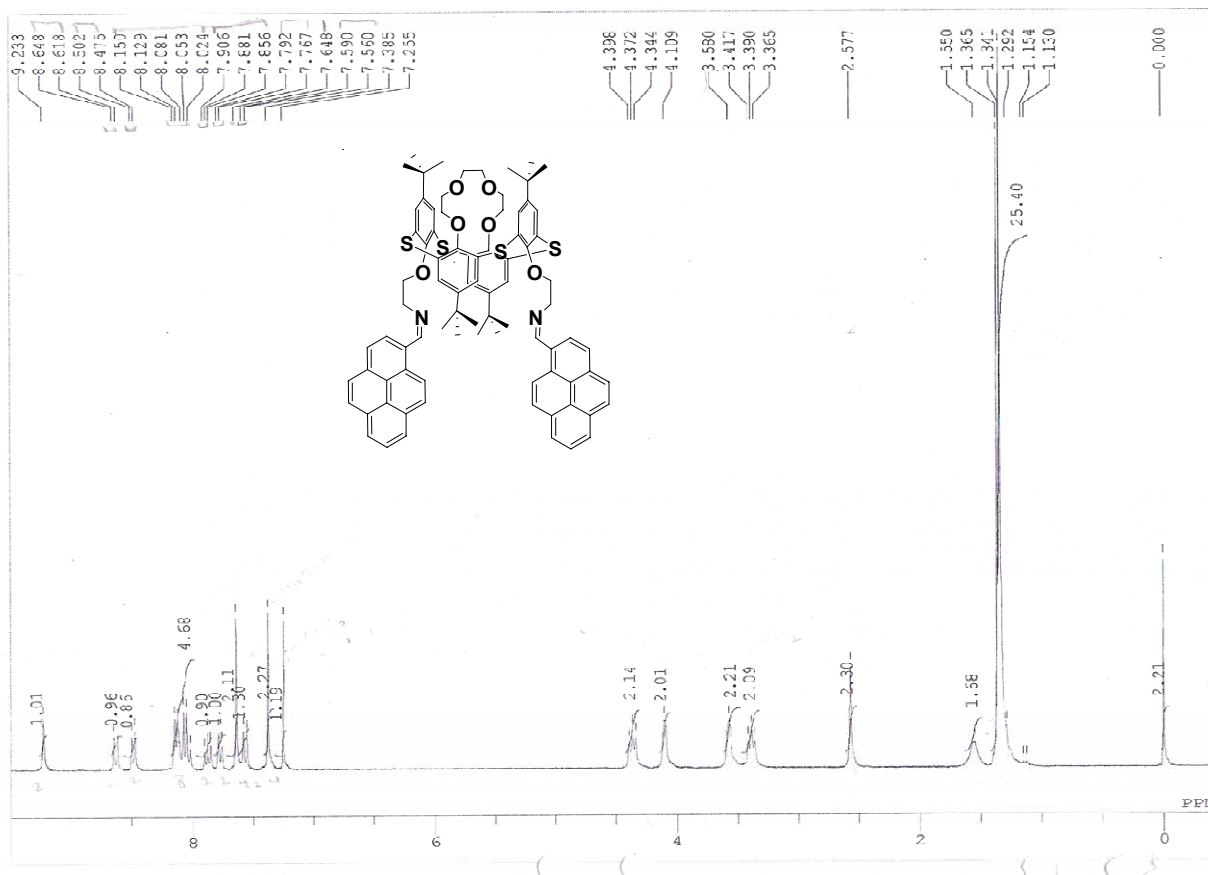

$^{13}\text{C}$  NMR spectrum of compound 4

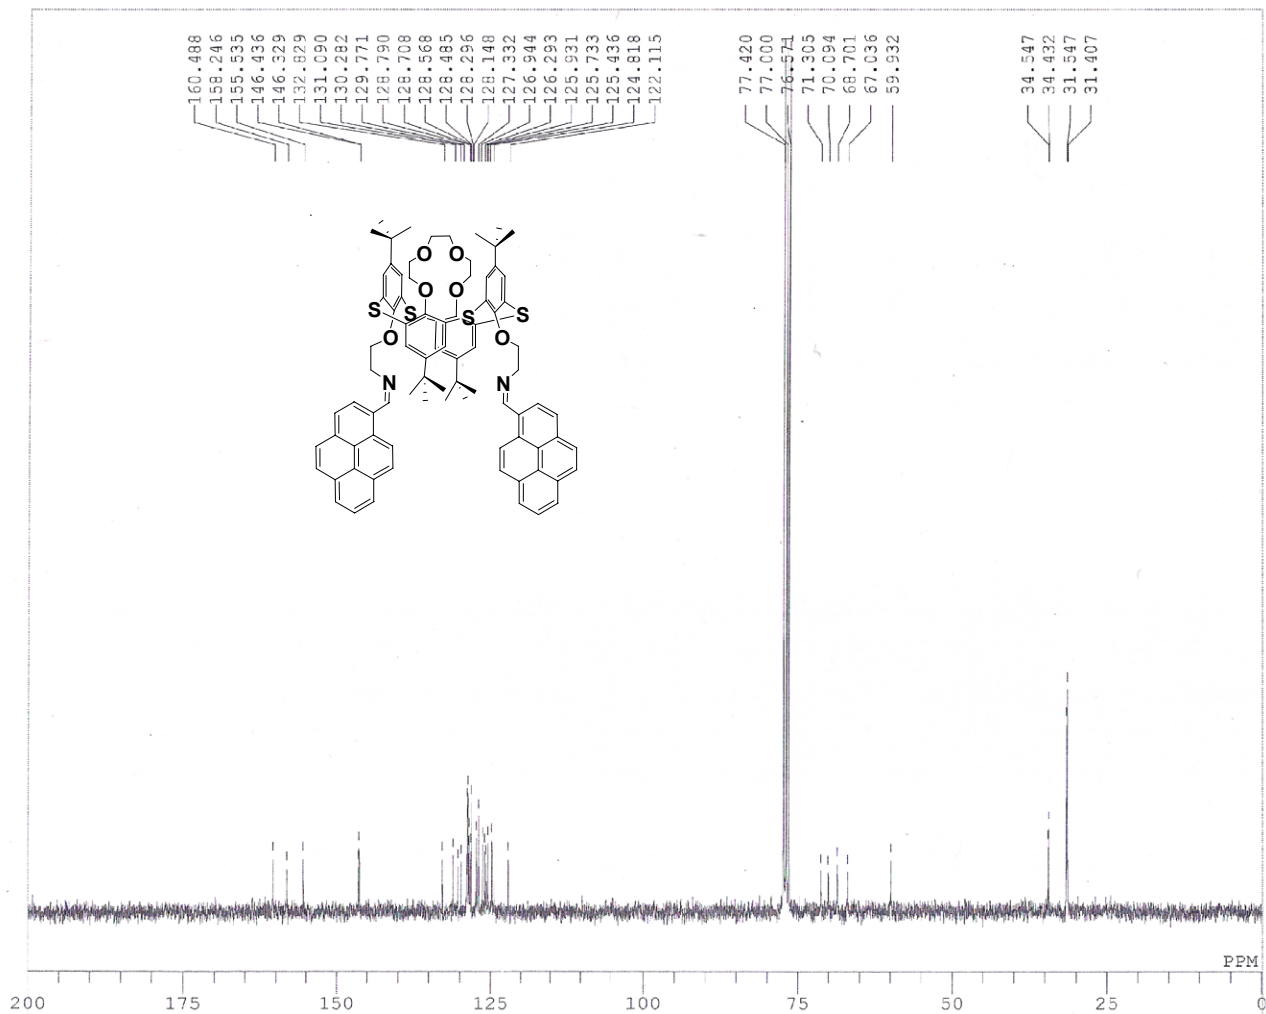

### Mass spectrum of compound 4

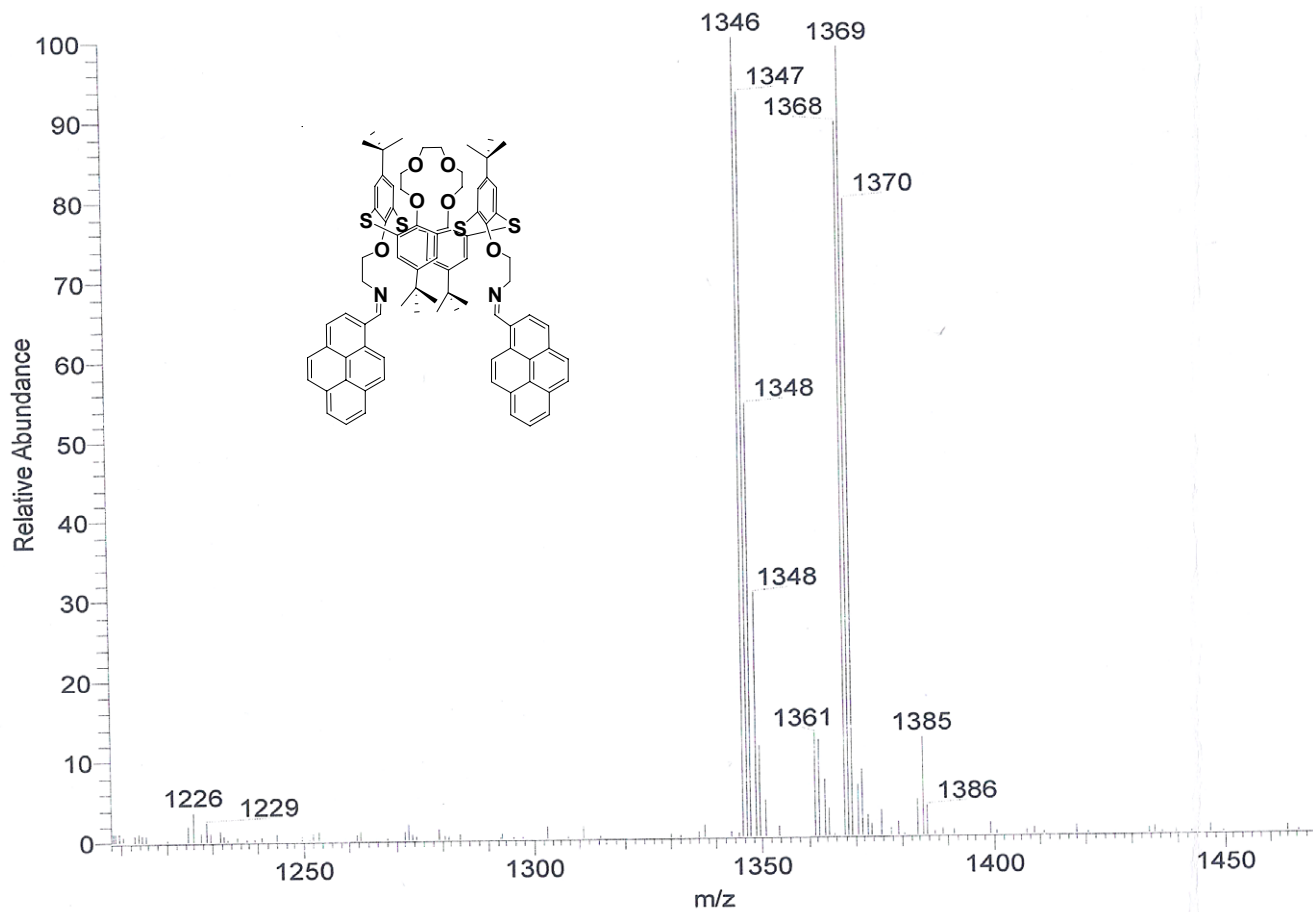

### IR Spectrum of compound 4

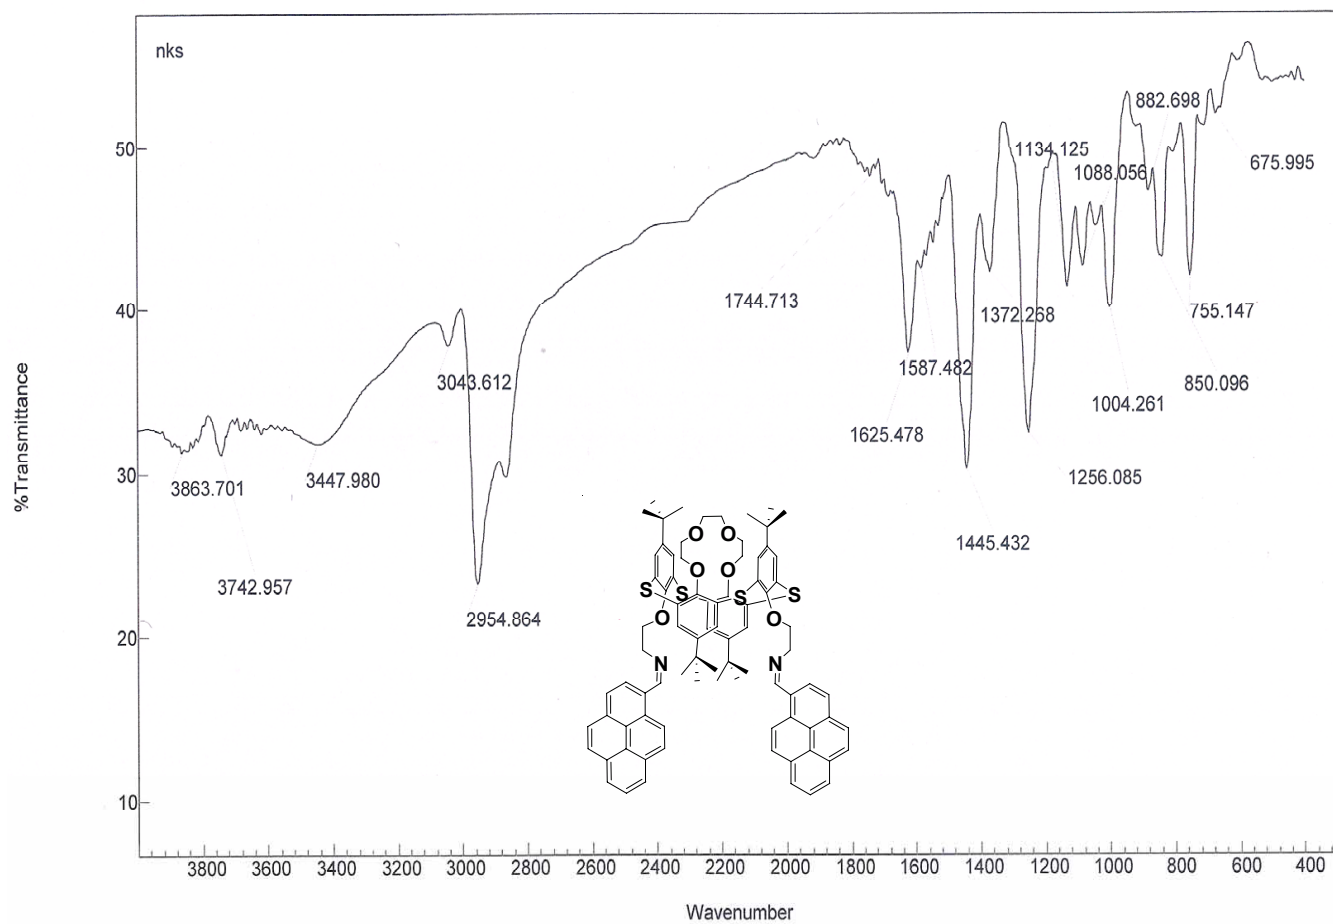

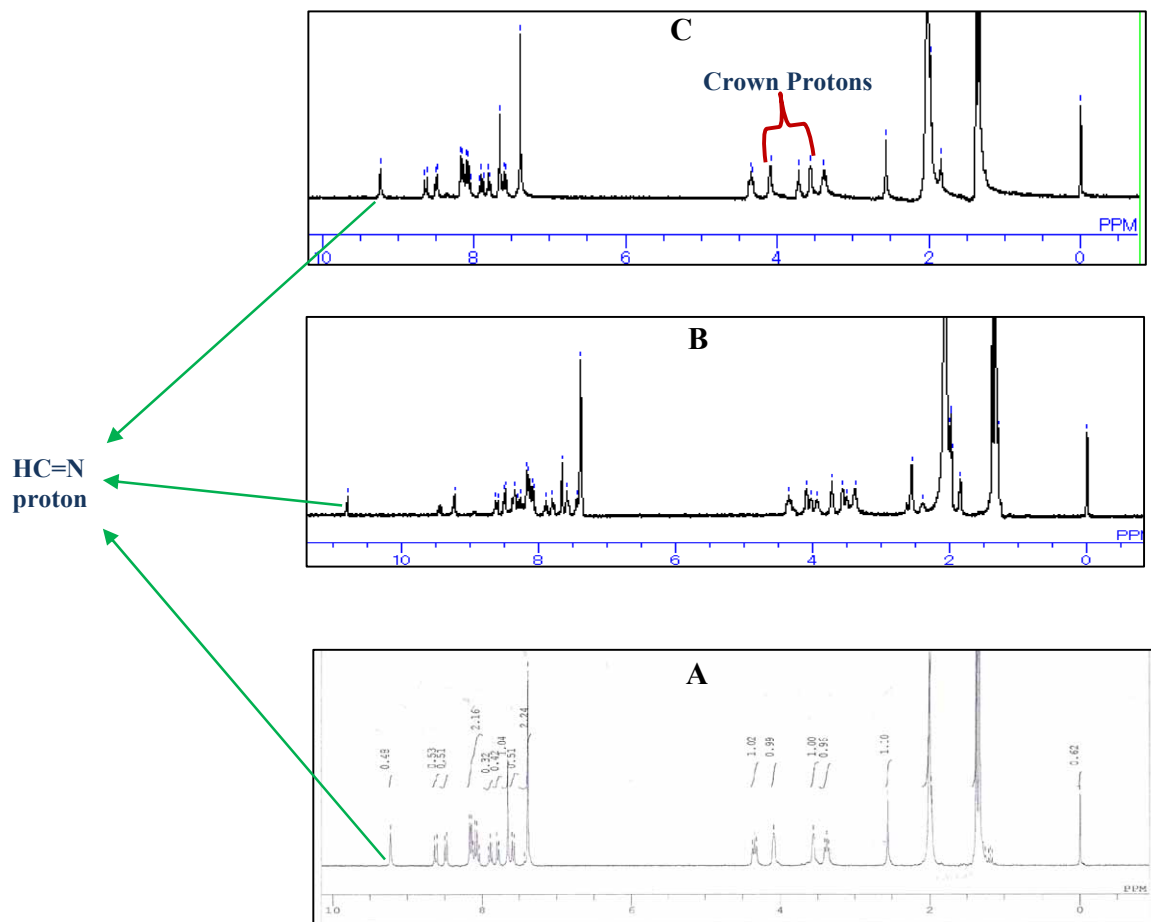

$^1\text{H}$  NMR spectra of **4** in  $\text{CDCl}_3/\text{CD}_3\text{CN}$  (8:2). (A) Free ligand (B) in presence of 1.0 equiv of mercury perchlorate; (C) in presence of 1.0 equiv of lithium perchlorate.
